# Supplementary material for: Selective Targeting of SH2 Domain–Phosphotyrosine Interactions of Src Family Tyrosine Kinases with Monobodies
Source: PubMed Central journal article supplement — J Mol Biol. 2017 May 5;429(9):1364–80. doi: 10.1016/j.jmb.2017.03.023 (PMC5417323; doi:10.1016/j.jmb.2017.03.023), 2017-05-05
Supplement: mmc1.pdf [file mmc1.pdf]

## **Supplementary Information**

### **Selective Targeting of SH2 Domain-Phosphotyrosine Interactions of Src Family Tyrosine Kinases with Monobodies**

Tim Kükenshöner, Nadine Eliane Schmit, Emilie Bouda, Fern Sha, Florence Pojer, Akiko Koide, Markus Seeliger, Shohei Koide and Oliver Hantschel

## **Content**

**Supplementary Information Figures 1-10**

**Supplementary Information Tables 1-3**

## Supplementary Figures 1-10

(a)

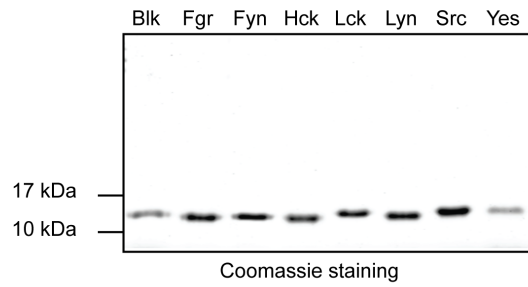

(b)

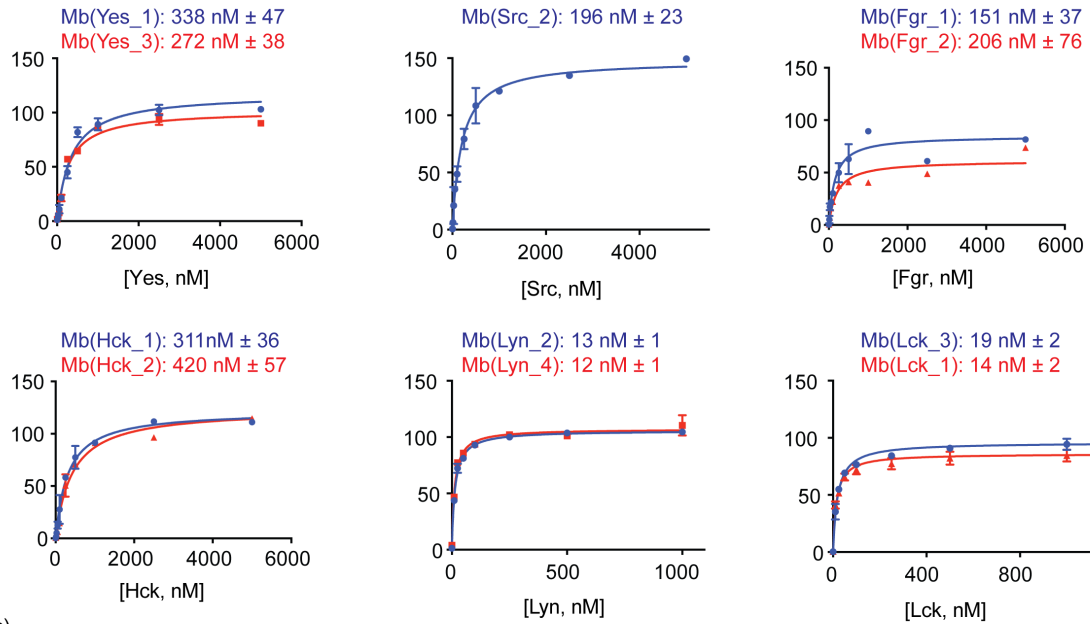

(c)

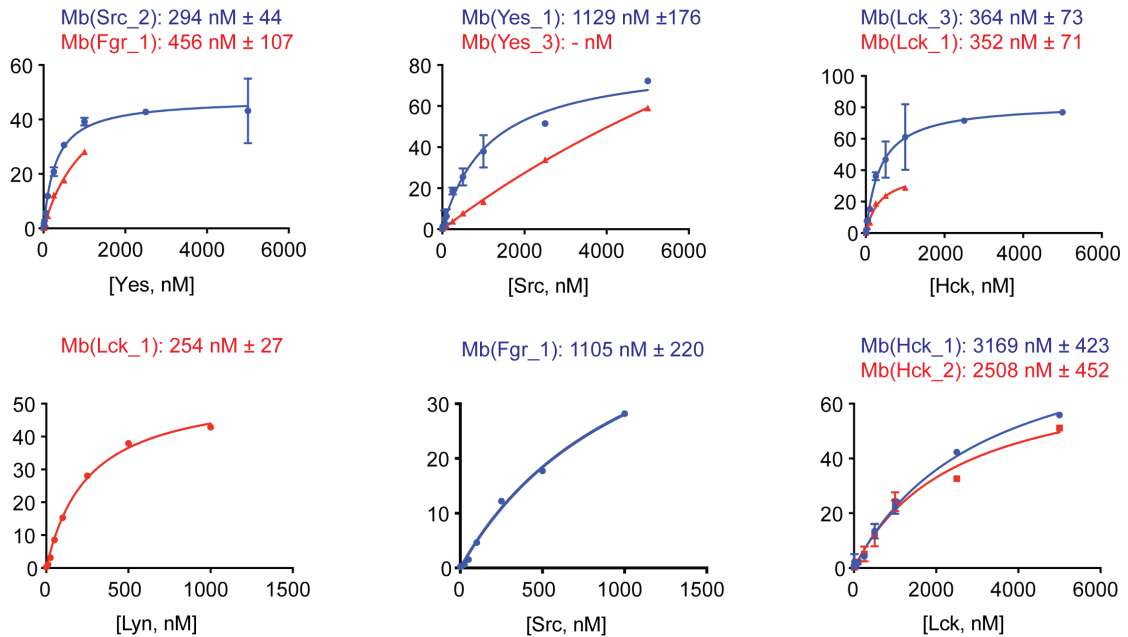

**SI Figure 1:** Target quality and affinity of binding clones. (a) Coomassie stained SDS-PAGE gel of 15  $\mu$ L purified SH2 SFK domains at 15  $\mu$ M concentration. All SFK SH2 domains have a calculated molecular weight of 13-14 kDa. These SH2 domains have been cleaved by TEV-protease and hence do not contain the 6xHis-Avi tags any more. A sequences alignment of all SFK SH2 domains used on this study is shown in SI Fig. 8. (b) Binding measurements by yeast surface display of representative monobodies used on this study. The mean fluorescence intensities of yeast cells displaying a monobody are plotted as a function of the concentration of the target. The errors indicated are the standard deviations from curve fitting of the 1:1 binding model. The derived  $K_d$  values from these graphs are reported in Fig. 1. Binding curves of monobody displaying yeast cells at different concentrations for their on-target and (c) monobody displaying yeast cell binding to other (off-target) Src family kinases SH2 domains.

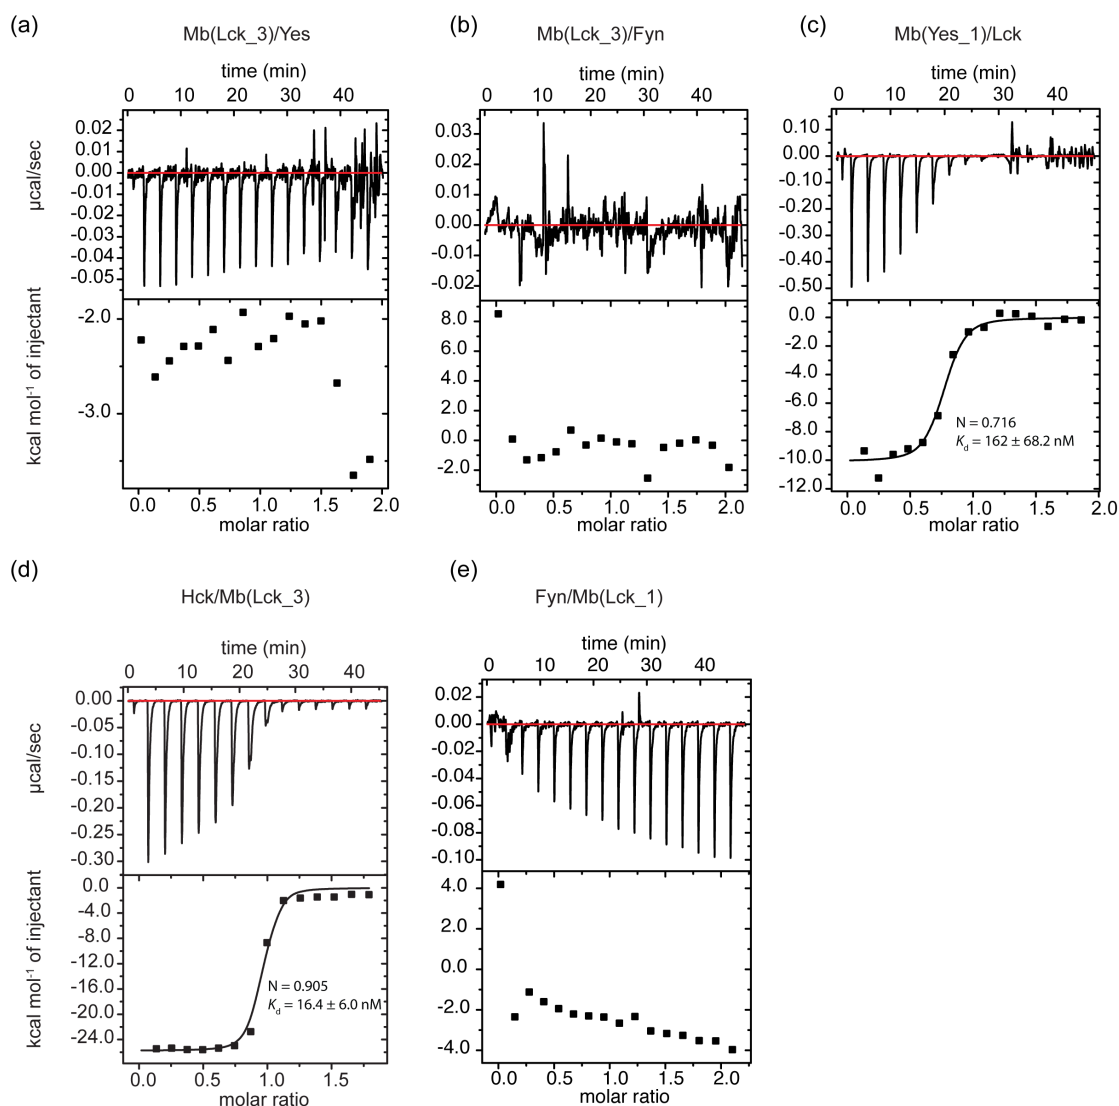

**SI Figure 2:** Isothermal titration calorimetry of monobody/SH2 interactions (upper panels) and fitted isotherms data of integrated peaks (lower panel) are shown for representative experiments. Labels show titration direction (first named in syringe and second in cell) and thermodynamic data of the fit generated by the MicroCal evaluation software. (a) Mb(Lck\_3) (140  $\mu\text{M}$ ) titrated to Yes SH2 domain (15  $\mu\text{M}$ ), (b) Mb(Lck\_3) (150  $\mu\text{M}$ ) titrated to Fyn SH2 domain (15  $\mu\text{M}$ ), (c) Mb(Yes\_1) (400  $\mu\text{M}$ ) titrated to Lck SH2 domain (40  $\mu\text{M}$ ), (d) Hck SH2 domain (95  $\mu\text{M}$ ) titrated to Mb(Lck\_3) (10  $\mu\text{M}$ ), (e) Fyn SH2 (176  $\mu\text{M}$ ) titrated to Mb(Lck\_1) (17  $\mu\text{M}$ ). All experiments have been conducted at 25°C.

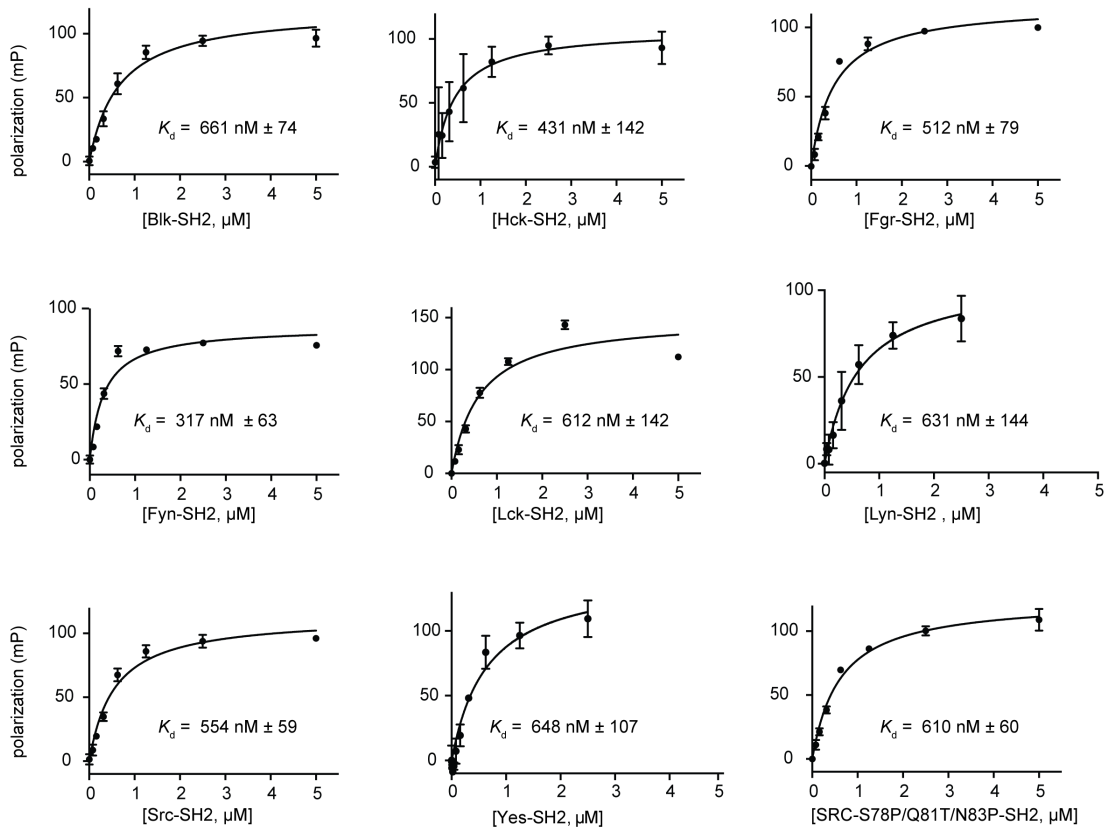

**SI Figure 3:** Fluorescence polarization assay of SFK SH2 domains and FITC-labeled pYEEI peptide. 250 nM (final concentration) of the pYEEI peptide were mixed with the indicated concentrations of recombinant SH2 domain of all eight Src family kinases as well as the mutant SRC-S78P/Q81T/N83P (see Fig. 7) to measure binding. All  $K_d$  values are shown in the graphs and have been fitted based on a 1:1 binding model (one-site specific binding, Prism).

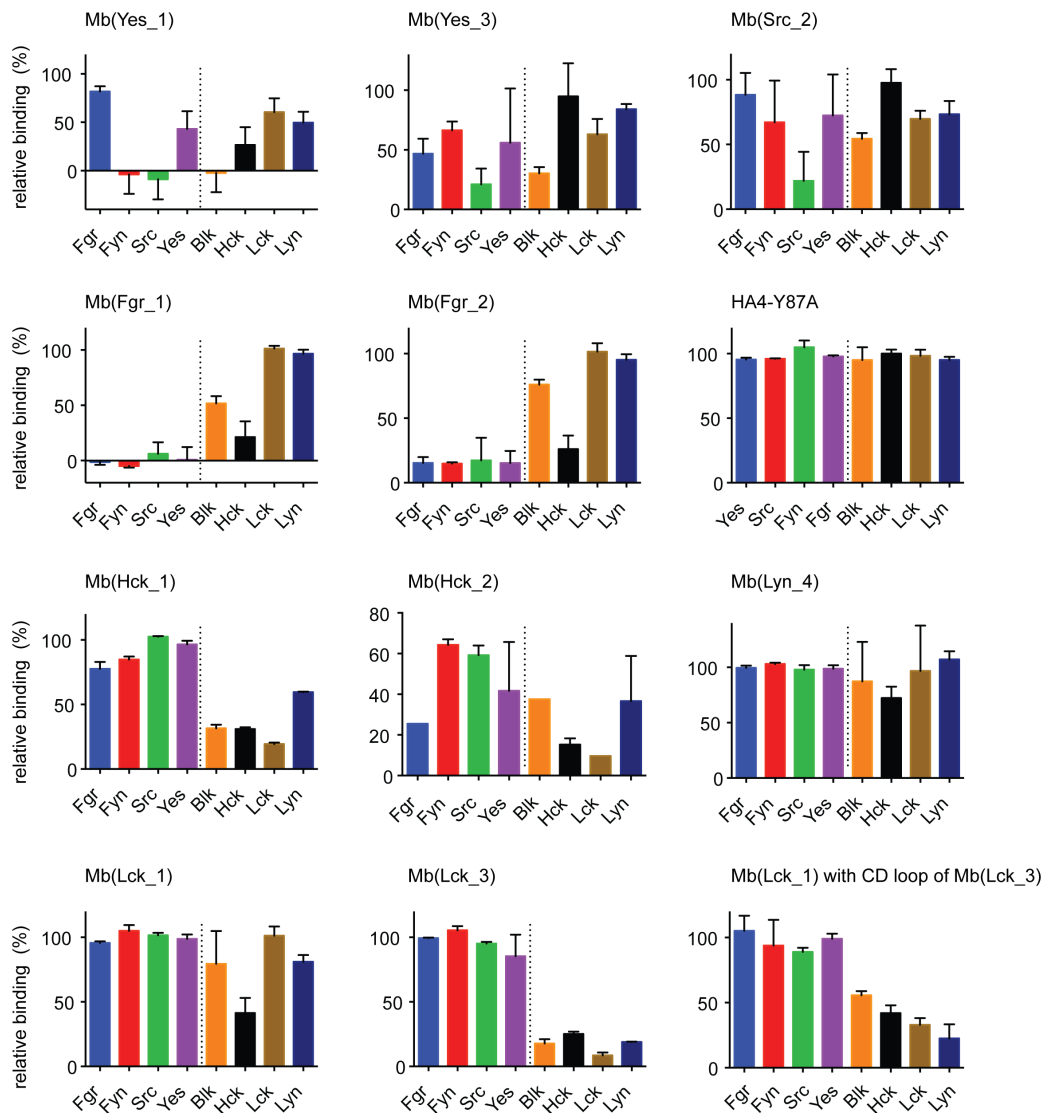

**SI Figure 4:** Inhibition of pYEEI peptide/SH2 interaction by monobodies in a fluorescence polarization assay. The graph shows relative pYEEI peptide binding (in %) to the SH2 domains (2.5  $\mu$ M) in the presence of the indicated monobody (in 5-fold excess, i.e. 12.5  $\mu$ M). In the lower right panel, a designed monobody, which is a chimeric variant of Mb(Lck\_1) and Mb(Lck\_3) has also been tested. This monobody contains the FG loop of Mb(Lck\_1) and the CD loop of Mb(Lck\_3). Further experiments with this chimeric monobody are shown in Figure 7. All eight SH2 domains have been measured without (see Fig. S3) and in the presence of the monobody selected for the respective on-target (see Fig. 4 a-b). The pYEEI peptide in isolation and SH2/pYEEI complex were set to 0% and 100% binding, respectively. Accordingly the reduction in binding observed with a monobody is expressed as a percentage of relative binding. Each datapoint corresponds to the average of at least two repeats +/- SD.

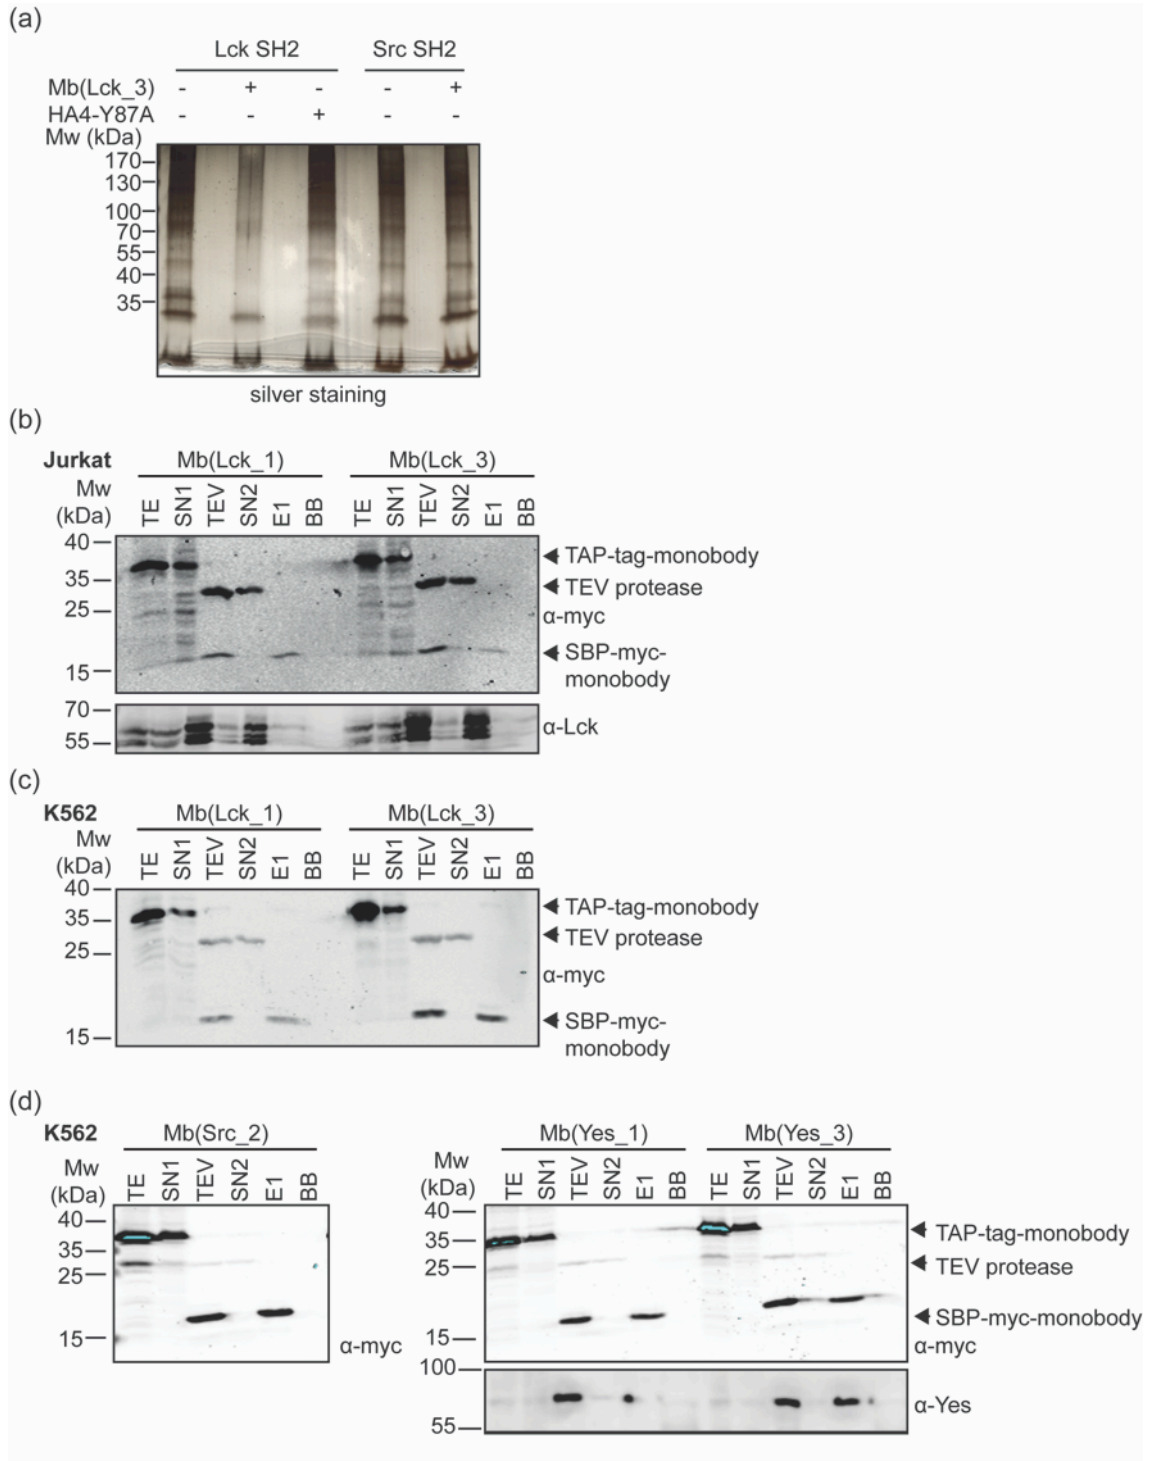

**SI Figure 5:** Mb(Lck\_3) blocks the binding of Lck SH2 domain to interactors in cell lysates. (a) 10% fraction of beads after SH2 pull-down, separated by SDS/PAGE and visualized with silver staining. (b-d) SFK SH2 domain targeting monoclonal antibodies bind their main target in cells. (b) Immunoblot analysis of TAP of Mb(Lck\_1) and Mb(Lck\_3) monoclonal antibody complexes from Jurkat cells (see Fig. 5d). TE, total extract; SN1, supernatant IgG beads; TEV, eluate after TEV cleavage; SN2, supernatant streptavidin beads; E1, eluate from streptavidin beads; BB, boiled streptavidin beads to control the efficiency of elution. The bait protein as well as the main target of the monoclonal antibodies were identified by immunoblotting using an anti-Myc or Lck antibody, respectively. (c) Immunoblot analysis of (Mb(Lck\_1) and Mb(Lck\_3) monoclonal antibody from K562 (Abbreviations as in (a)). (d) Immunoblot analysis of TAP of Mb(Src\_2), Mb(Yes\_1) and Mb(Yes\_3) monoclonal antibody complexes from K562 cells (see Fig. 5c). The bait protein as well as the main target Yes were identified by immunoblotting using an anti-Myc or Yes antibody, respectively.



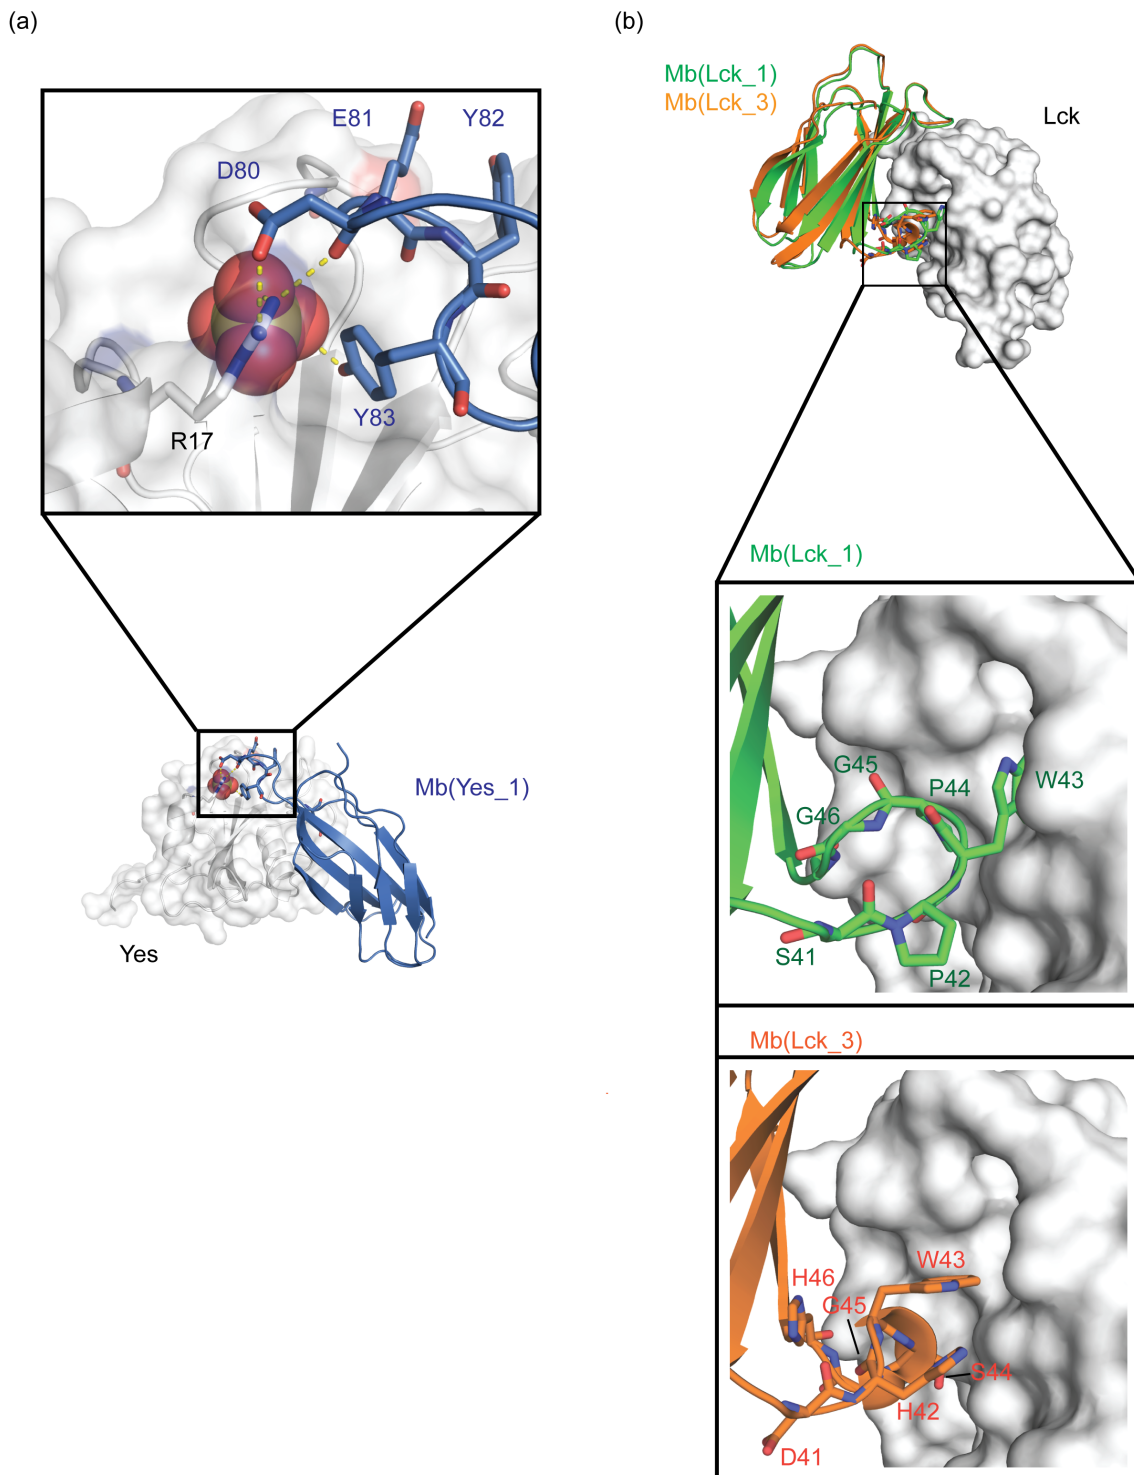

**SI Figure 6:** Monobody/SH2 – Structures. (a) Detailed view of Mb(Yes\_1) binding to Yes SH2 domains showing the residues of the monobody FG loop involved to block the pY pocket of the SH2 domain (presented as blue sticks). A sulphate that was found in the pY pocket is shown as spheres. Hydrogen bonds are depicted as yellow dashed lines. (b) Overview of Mb(Lck\_1) compared to Mb(Lck\_3) binding to the Lck SH2 domain (overlay, top picture). The close-up shows the diversified residues of the monobody CD loops (presented as sticks) for Mb(Lck\_1) (green, middle panel) and for Mb(Lck\_3) (orange, lower panel) binding to the +3 specificity pocket of the Lck SH2 domain.

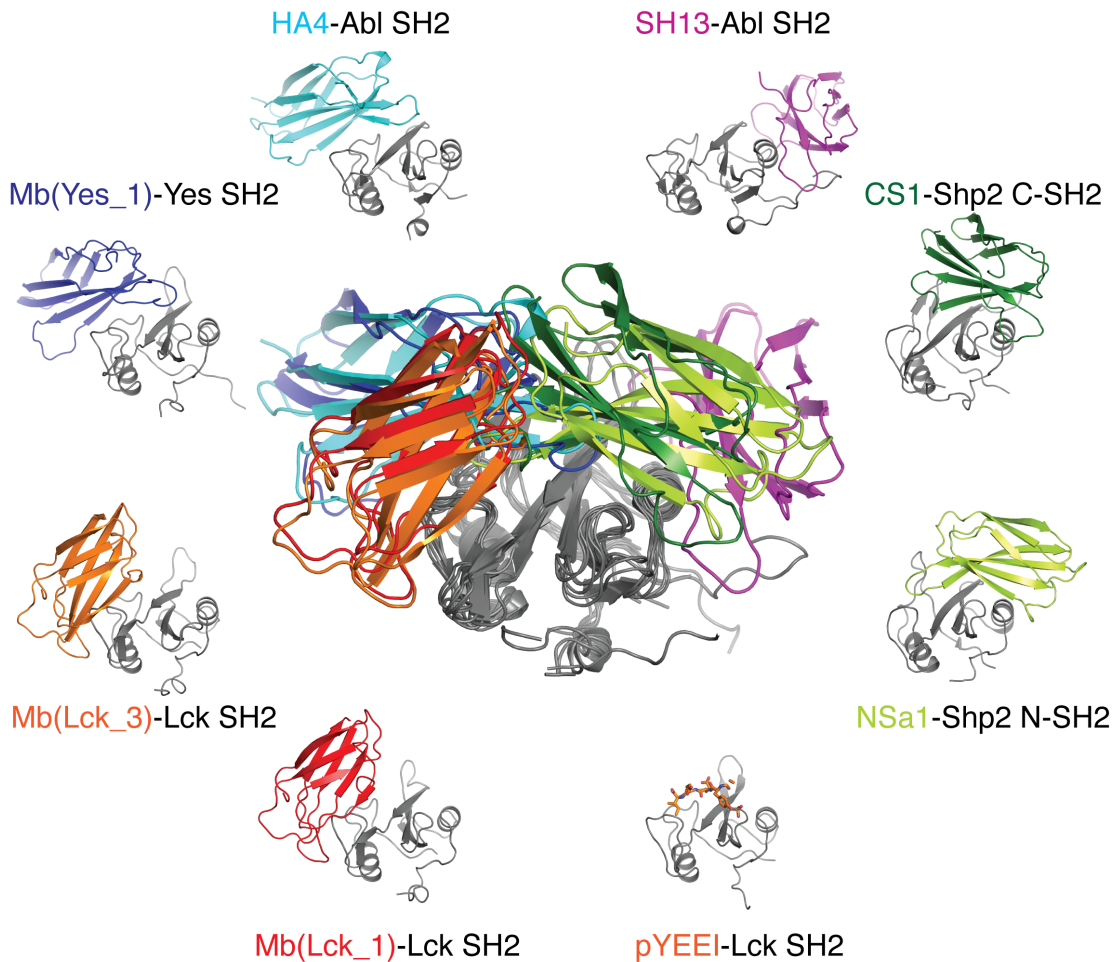

**SI Figure 7:** Structures of monobodies targeting different SH2 domains. Seven individual co-crystal structures of monobodies targeting SH2 domains (three structures reported in this study and four from previous studies) as well as the pYEEI peptide/Lck complex are shown. The SH2 domains are depicted in white whereas the monobodies and the pYEEI peptide are shown in different colors. The model in the center is a superimposition of all structures aligned to one SH2 domain. PDB entries used were: 3K2M (HA4-Abl SH2), 3UYO (SH13-Abl SH2), 4JE4 (NSa1-Shp2 N-SH2), 4JEG (CS1-Shp2 C-SH2) and 1LKK (pYEEI peptide-Lck SH2).

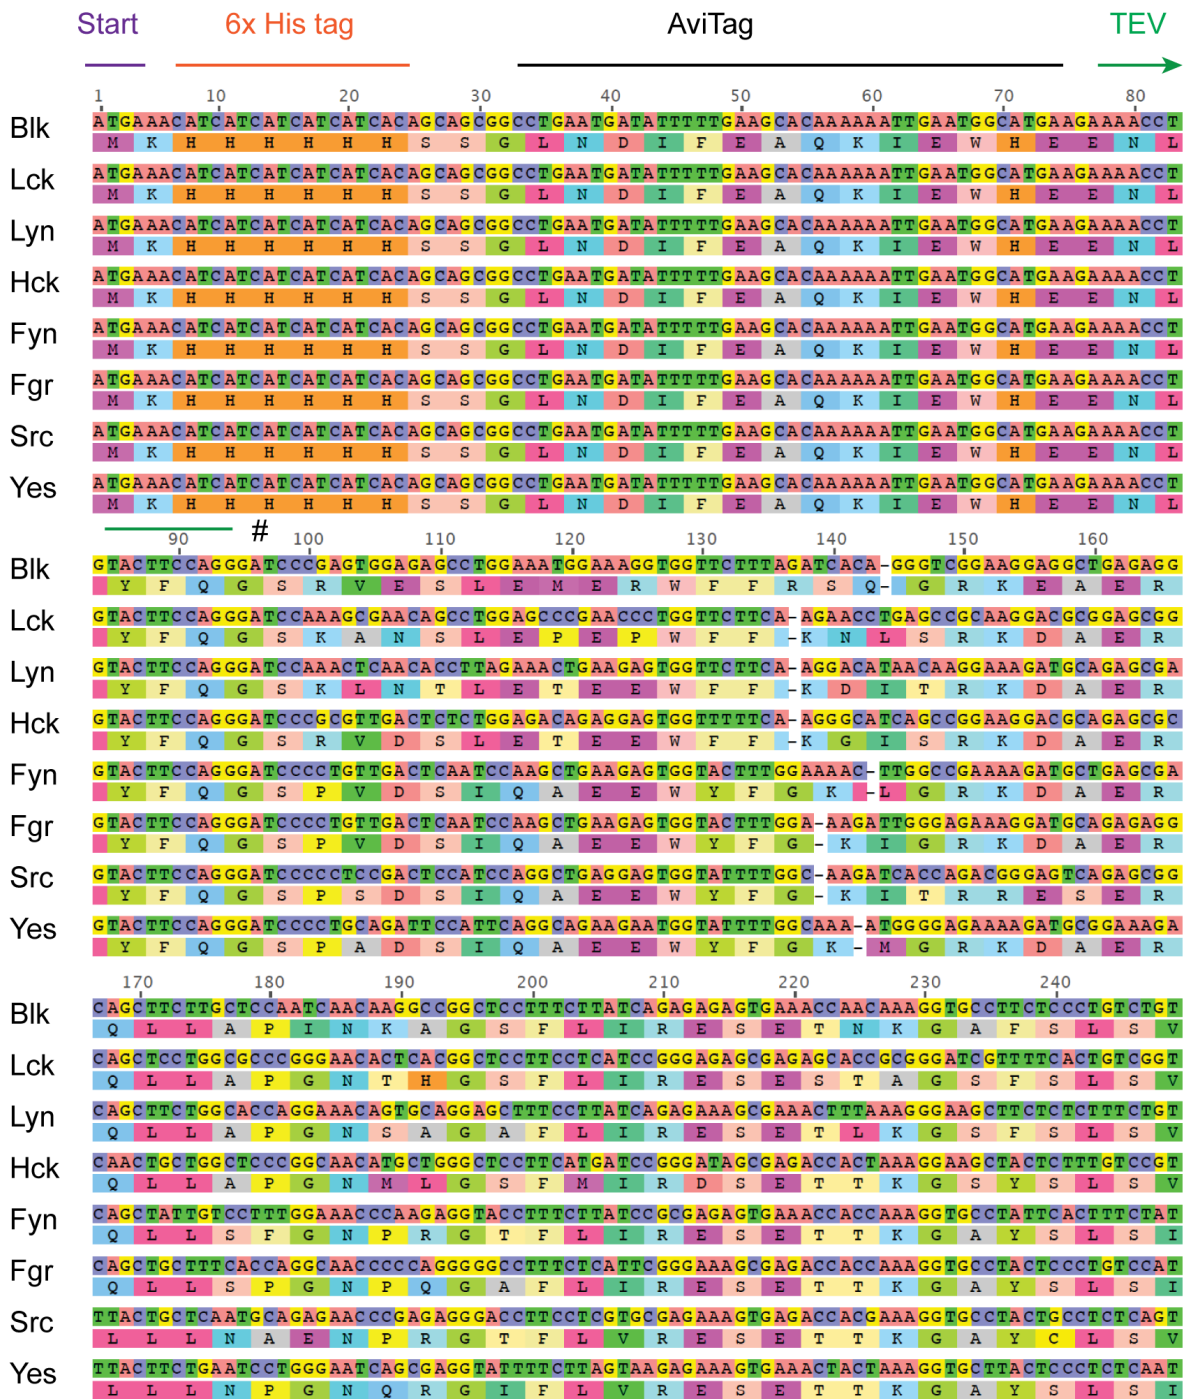

Sequences continue on next page

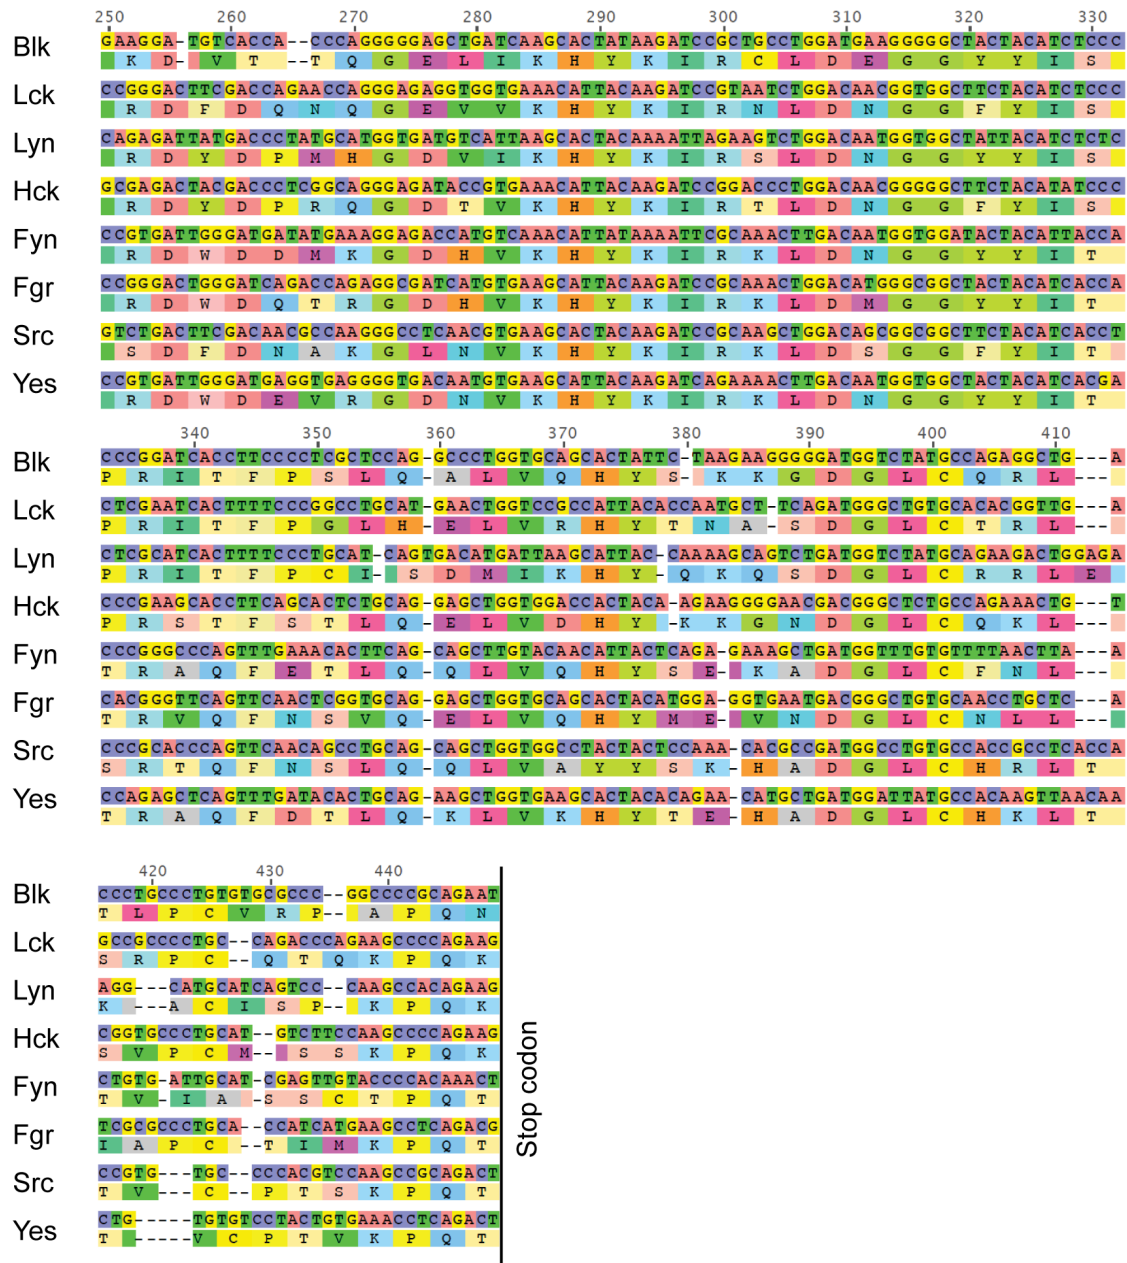

#: BamHI restriction site

**SI Figure 8:** Alignment of DNA and protein sequences of the SFK SH2 constructs used in our study. The sequences show the expressed protein/mRNA from the pHBT vector including 6xHis tag, AviTag, TEV cleavage site and SH2 sequence until the Stop codon. The alignment has been created with Geneious™ using a standard color scheme of the software. Each amino acid has a different color background in order to make sequence comparison easier.

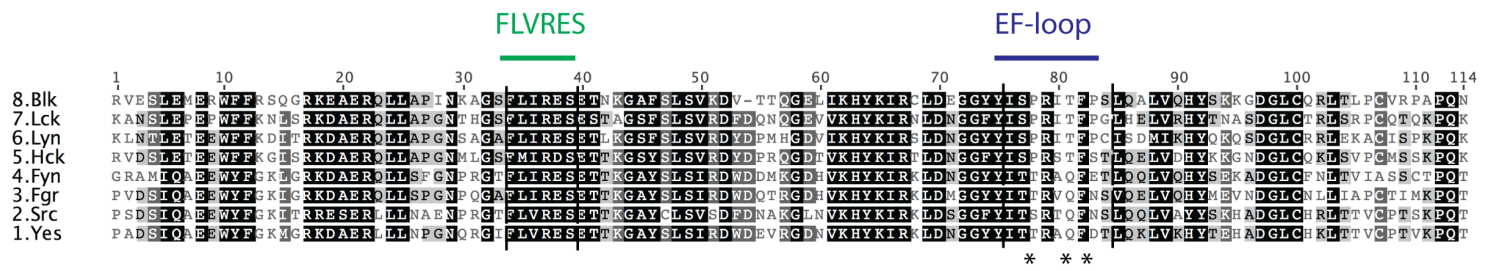

\* residues which have been mutated in our study.

**SI Figure 9:** Protein sequence alignment of all SFK SH2 domains used in this study. Vertical bars mark the sequence of the FLVRES motif (with a critical Arg residue for pY binding) and the EF-loop (contacted by the FG-loops of Mb(Lck\_1) and Mb(Lck\_3); see Fig. 7). The conservation of the residues at each position is visualized by a scale from black (high conservation) to white (low conservation).

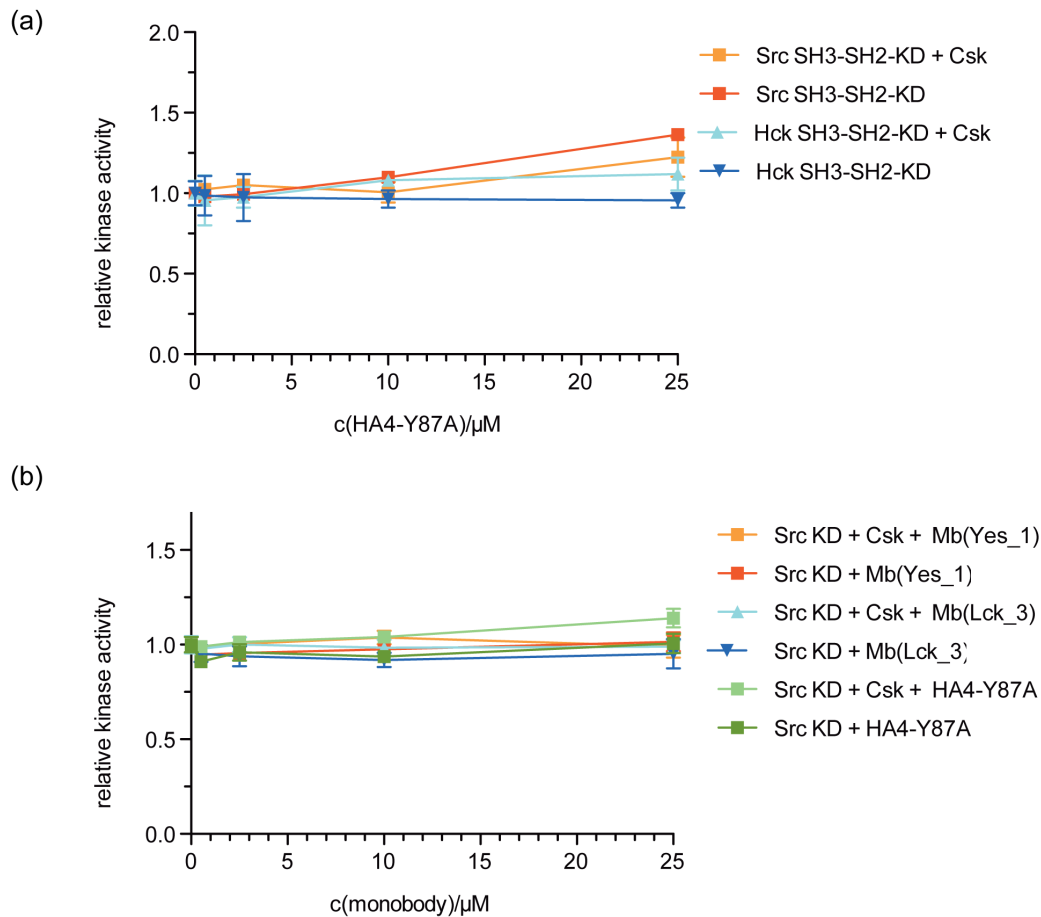

**SI Figure 10:** Control experiments for the kinase activity assays of Fig.8. *In vitro* kinase activity of Src and Hck was measured in the absence or presence of Csk and set to 1.0. (a) Relative changes in kinase activity are shown at the indicated concentrations of monobody HA4-Y87A. (b) Effect of monobodies Mb(Yes\_1) and Mb(Lck\_3) on the relative kinase activity of the Src kinase domain (Src KD). The preparations of the Src KD proteins used in these assays displayed robust kinase activities with  $k_{cat}=60-80 \text{ min}^{-1}$ . Each datapoint corresponds to the average of three repeats +/- SD.



## SI Table 2: Total spectrum counts of the proteins identified by mass spectrometry following tandem affinity purification of stable Jurkat and K562 cell lines expressing the bait proteins Mb(Lck\_1) or Mb(Lck\_3), 1st TAP.

Scaffold: Version: Scaffold\_4.4.5

Modification Metadata Set: 1541 modifications

Source: C:\Program Files\Scaffold 4\parameters\unimod.xml

Comment:

Protein Grouping Strategy: Experiment-wide grouping with binary peptide-protein weights

Peptide Thresholds: 95.0% minimum

Protein Thresholds: 99.0% minimum and 2 peptides minimum

Peptide FDR: 0.1% (Decoy)

Protein FDR: 1.6% (Decoy)

GO Annotation Source(s):

Displaying: Total Spectrum Count

| Identified Proteins (79)                                                                           | Accession Number       | Molecular Weight | Protein Grouping Ambiguity | Jurkat Mb(Lck_1) | Jurkat Mb(Lck_3) | K562 Mb(Lck_1) | K562 Mb(Lck_3) |
|----------------------------------------------------------------------------------------------------|------------------------|------------------|----------------------------|------------------|------------------|----------------|----------------|
| Tyrosine-protein kinase Lyn OS=Homo sapiens GN=LYN PE=1 SV=3                                       | P07948                 | 59 kDa           | TRUE                       | 1                | 1                | 112            | 53             |
| Keratin, type II cytoskeletal 1 OS=Homo sapiens GN=KRT1 PE=1 SV=6                                  | P04264                 | 66 kDa           | TRUE                       | 56               | 31               | 138            | 46             |
| Keratin, type I cytoskeletal 9 OS=Homo sapiens GN=KRT9 PE=1 SV=3                                   | P35527                 | 62 kDa           | TRUE                       | 46               | 37               | 91             | 42             |
| ML1_Nadine_Schmitt_151201                                                                          | ML1                    | 18 kDa           | TRUE                       | 6                | 0                | 54             | 31             |
| MC2_Nadine_Schmitt_151201                                                                          | MC2                    | 19 kDa           | TRUE                       | 5                | 11               | 49             | 28             |
| Keratin, type II cytoskeletal 2 epidermal OS=Homo sapiens GN=KRT2 PE=1 SV=2                        | P35908                 | 65 kDa           | TRUE                       | 33               | 32               | 95             | 27             |
| Keratin, type I cytoskeletal 10 OS=Homo sapiens GN=KRT10 PE=1 SV=6                                 | P13645                 | 59 kDa           | TRUE                       | 27               | 20               | 89             | 19             |
| Stress-70 protein, mitochondrial OS=Homo sapiens GN=HSPA9 PE=1 SV=2                                | P38646                 | 74 kDa           | TRUE                       | 0                | 0                | 41             | 14             |
| Keratin, type I cytoskeletal 14 OS=Homo sapiens GN=KRT14 PE=1 SV=4                                 | P02533                 | 52 kDa           | TRUE                       | 13               | 0                | 88             | 11             |
| Talin-1 OS=Homo sapiens GN=TLN1 PE=1 SV=3                                                          | Q91490                 | 270 kDa          | 0                          | 0                | 12               | 7              | 0              |
| Dermcidin OS=Homo sapiens GN=DCD PE=1 SV=2                                                         | P81605 (+1)            | 11 kDa           | 0                          | 0                | 9                | 7              | 0              |
| CUB domain-containing protein 1 OS=Homo sapiens GN=CDCP1 PE=1 SV=3                                 | Q9HSV8                 | 93 kDa           | 0                          | 0                | 31               | 6              | 0              |
| Ubiquitin-40S ribosomal protein S27a (Fragment) OS=Homo sapiens GN=RP527A PE=1 SV=1                | J3QTR3                 | 12 kDa           | TRUE                       | 0                | 1                | 18             | 5              |
| Tubulin alpha-1C chain OS=Homo sapiens GN=TUBA1C PE=1 SV=1                                         | F5H5D3 (+1)            | 58 kDa           | 7                          | 4                | 9                | 4              | 0              |
| Desmoglein OS=Homo sapiens GN=JUP PE=1 SV=3                                                        | P15924                 | 332 kDa          | 6                          | 1                | 6                | 4              | 0              |
| Protein Shroom3 OS=Homo sapiens GN=SHROOM3 PE=1 SV=2                                               | Q8TF72                 | 217 kDa          | 3                          | 0                | 3                | 4              | 0              |
| Diacylglycerol kinase theta OS=Homo sapiens GN=DGKQ PE=1 SV=2                                      | P52824                 | 101 kDa          | 0                          | 0                | 0                | 4              | 0              |
| Heat shock cognate 71 kDa protein OS=Homo sapiens GN=HSPA8 PE=1 SV=1                               | P11142                 | 71 kDa           | TRUE                       | 1                | 1                | 54             | 3              |
| Tubulin beta chain OS=Homo sapiens GN=TUBB PE=1 SV=2                                               | P07437                 | 50 kDa           | TRUE                       | 5                | 2                | 9              | 3              |
| Junction plakoglobin OS=Homo sapiens GN=JUP PE=1 SV=3                                              | P14923                 | 82 kDa           | 1                          | 0                | 3                | 3              | 0              |
| DNA-dependent protein kinase catalytic subunit OS=Homo sapiens GN=PRKDC PE=1 SV=3                  | P78527                 | 469 kDa          | 0                          | 0                | 44               | 2              | 0              |
| Heat shock 70 kDa protein 1A/1B OS=Homo sapiens GN=HSPA1A PE=1 SV=5                                | P08107                 | 70 kDa           | TRUE                       | 0                | 0                | 6              | 2              |
| Fatty acid-binding protein, epidermal OS=Homo sapiens GN=FABP5 PE=1 SV=3                           | Q01469                 | 15 kDa           | 0                          | 0                | 2                | 2              | 0              |
| Protocadherin alpha-C1 OS=Homo sapiens GN=PCDHAC1 PE=2 SV=2                                        | Q9H158 (+1)            | 104 kDa          | 0                          | 0                | 0                | 2              | 0              |
| Heat shock protein HSP 90-beta OS=Homo sapiens GN=HSP90A1 PE=1 SV=4                                | P08238                 | 83 kDa           | 1                          | 1                | 17               | 1              | 0              |
| Sarcoplasmic/endoplasmic reticulum calcium ATPase 2 (Fragment) OS=Homo sapiens GN=ATP2A2 PE=1 SV=1 | P07437                 | 103 kDa          | 2                          | 0                | 5                | 11             | 0              |
| Fatty acid synthase OS=Homo sapiens GN=FASN PE=1 SV=3                                              | P49327                 | 273 kDa          | 0                          | 0                | 5                | 1              | 0              |
| Cornifin-B OS=Homo sapiens GN=SPRR1B PE=1 SV=2                                                     | P22528 (+1)            | 10 kDa           | 1                          | 0                | 3                | 1              | 0              |
| Acetyl-CoA carboxylase 1 OS=Homo sapiens GN=ACACA PE=1 SV=2                                        | Q13085 (+3)            | 266 kDa          | TRUE                       | 0                | 0                | 2              | 1              |
| Sodium/potassium-transporting ATPase subunit alpha-2 OS=Homo sapiens GN=ATP1A2 PE=1 SV=1           | B1AKY9                 | 111 kDa          | 5                          | 5                | 0                | 1              | 0              |
| Titin OS=Homo sapiens GN=TTN PE=1 SV=1                                                             | A0A040MNT57-DECOY (+3) | 2                | 0                          | 0                | 0                | 1              | 0              |
| Keratin, type I cytoskeletal 16 OS=Homo sapiens GN=KRT16 PE=1 SV=4                                 | P08779                 | 51 kDa           | TRUE                       | 13               | 0                | 98             | 0              |
| Keratin, type II cytoskeletal 6A OS=Homo sapiens GN=KRT6A PE=1 SV=3                                | P02538                 | 60 kDa           | TRUE                       | 0                | 0                | 72             | 0              |
| Keratin, type II cytoskeletal 5 OS=Homo sapiens GN=KRT5 PE=1 SV=3                                  | P13647                 | 62 kDa           | TRUE                       | 0                | 0                | 55             | 0              |
| Keratin, type II cytoskeletal 17 OS=Homo sapiens GN=KRT17 PE=1 SV=2                                | Q04695                 | 48 kDa           | TRUE                       | 6                | 0                | 41             | 0              |
| Keratin, type I cytoskeletal 13 OS=Homo sapiens GN=KRT13 PE=1 SV=1                                 | K7ER63 (+2)            | 65 kDa           | 0                          | 0                | 0                | 0              | 0              |
| Keratin, type II cuticular Hb6 OS=Homo sapiens GN=KRT86 PE=1 SV=1                                  | O43790                 | 53 kDa           | TRUE                       | 0                | 0                | 25             | 0              |
| Heat shock protein HSP 90-alpha OS=Homo sapiens GN=HSP90A1 PE=1 SV=5                               | P07900 (+1)            | 85 kDa           | TRUE                       | 1                | 4                | 23             | 0              |
| 78 kDa glucose-regulated protein OS=Homo sapiens GN=HSPAS PE=1 SV=2                                | P11021                 | 72 kDa           | TRUE                       | 0                | 0                | 19             | 0              |
| Keratin, type II cytoskeletal 4 OS=Homo sapiens GN=KRT4 PE=1 SV=4                                  | P19013                 | 57 kDa           | TRUE                       | 0                | 0                | 18             | 0              |
| CAD protein OS=Homo sapiens GN=CAD PE=1 SV=1                                                       | F8VP04 (+1)            | 236 kDa          | 2                          | 0                | 8                | 0              | 0              |
| Keratin, type II cuticular Hb5 OS=Homo sapiens GN=KRT85 PE=1 SV=1                                  | P78386                 | 56 kDa           | TRUE                       | 0                | 0                | 15             | 0              |
| Keratin, type II cytoskeletal 73 OS=Homo sapiens GN=KRT73 PE=1 SV=1                                | Q86Y46                 | 59 kDa           | TRUE                       | 0                | 0                | 14             | 0              |
| Heat shock 70 kDa protein 1-like OS=Homo sapiens GN=HSPA1L PE=1 SV=2                               | P34931                 | 70 kDa           | TRUE                       | 0                | 0                | 14             | 0              |
| Bifunctional glutamate/proline-HRNA ligase OS=Homo sapiens GN=EPRS PE=1 SV=5                       | P07814                 | 171 kDa          | 1                          | 0                | 9                | 0              | 0              |
| Large proline-rich protein BAG6 OS=Homo sapiens GN=BAG6 PE=1 SV=2                                  | P46379 (+2)            | 119 kDa          | 0                          | 0                | 8                | 0              | 0              |
| Tyrosine-protein kinase Lck OS=Homo sapiens GN=LCK PE=1 SV=6                                       | P06239 (+1)            | 58 kDa           | TRUE                       | 114              | 109              | 7              | 0              |
| Clathrin heavy chain OS=Homo sapiens GN=CLTC PE=1 SV=1                                             | A0A087WVQ6 (+2)        | 192 kDa          | 0                          | 0                | 7                | 0              | 0              |
| Keratin, type I cuticular Ha1 OS=Homo sapiens GN=KRT31 PE=1 SV=3                                   | Q15323                 | 47 kDa           | TRUE                       | 0                | 0                | 7              | 0              |
| Keratin, type II cytoskeletal 8 OS=Homo sapiens GN=KRT8 PE=1 SV=7                                  | P05787 (+1)            | 54 kDa           | TRUE                       | 0                | 0                | 6              | 0              |
| Translational activator CNC1 OS=Homo sapiens GN=CNC1L1 PE=1 SV=6                                   | Q02616                 | 293 kDa          | 0                          | 1                | 4                | 0              | 0              |
| Small proline-rich protein 3 [Fragment] OS=Homo sapiens GN=SPRR3 PE=1 SV=5                         | B1AN48 (+1)            | 17 kDa           | 0                          | 0                | 3                | 0              | 0              |
| Vimentin OS=Homo sapiens GN=VIM PE=1 SV=1                                                          | B0YJC4 (+1)            | 50 kDa           | TRUE                       | 0                | 0                | 3              | 0              |
| Rho guanine nucleotide exchange factor 2 OS=Homo sapiens GN=ARHGEF2 PE=1 SV=4                      | Q92974 (+3)            | 112 kDa          | 0                          | 0                | 3                | 0              | 0              |
| Leucine-rich PPR motif-containing protein, mitochondrial OS=Homo sapiens GN=LRPPRC PE=1 SV=3       | P42704                 | 158 kDa          | 0                          | 0                | 3                | 0              | 0              |
| Hornetin OS=Homo sapiens GN=HNRN PE=1 SV=2                                                         | Q86123                 | 282 kDa          | 1                          | 3                | 2                | 0              | 0              |
| Serum albumin OS=Homo sapiens GN=ALB PE=1 SV=1                                                     | A0A0C4DGB6 (+4)        | 69 kDa           | 2                          | 0                | 2                | 0              | 0              |
| Exportin-2 OS=Homo sapiens GN=CSE1L PE=1 SV=3                                                      | P55060 (+2)            | 110 kDa          | 1                          | 0                | 2                | 0              | 0              |
| Nucleolin OS=Homo sapiens GN=NCL PE=1 SV=3                                                         | P19338                 | 77 kDa           | 0                          | 0                | 2                | 0              | 0              |
| Trifunctional enzyme subunit alpha, mitochondrial OS=Homo sapiens GN=HADHA PE=1 SV=2               | P40939                 | 83 kDa           | 0                          | 0                | 2                | 0              | 0              |
| 40S ribosomal protein S3 OS=Homo sapiens GN=RP53 PE=1 SV=1                                         | ESPL69 (+3)            | 25 kDa           | 0                          | 0                | 2                | 0              | 0              |
| Desmoglein-1 OS=Homo sapiens GN=DSG1 PE=1 SV=2                                                     | Q02413                 | 114 kDa          | 0                          | 0                | 2                | 0              | 0              |
| Probable helicase with zinc finger domain OS=Homo sapiens GN=HELZ PE=1 SV=1                        | J3Q541 (+1)            | 219 kDa          | 0                          | 0                | 2                | 0              | 0              |
| Plakophilin-1 OS=Homo sapiens GN=PKP1 PE=1 SV=1                                                    | A0A087WVY6 (+1)        | 81 kDa           | 0                          | 0                | 2                | 0              | 0              |
| Transcription intermediary factor 1-beta OS=Homo sapiens GN=TRIM28 PE=1 SV=5                       | Q13263 (+1)            | 89 kDa           | 0                          | 3                | 1                | 0              | 0              |
| Fanconi anemia group D2 protein OS=Homo sapiens GN=FRCD2 PE=1 SV=2                                 | Q98XV9                 | 164 kDa          | 1                          | 2                | 1                | 0              | 0              |
| E3 ubiquitin-protein ligase HUWE1 OS=Homo sapiens GN=HUWE1 PE=1 SV=3                               | Q72527 (+2)            | 482 kDa          | 0                          | 0                | 1                | 0              | 0              |
| Apoptosis-inducing factor 1, mitochondrial OS=Homo sapiens GN=AIFM1 PE=1 SV=1                      | OS8311 (+1)            | 67 kDa           | 0                          | 0                | 1                | 0              | 0              |
| Filaggrin-2 OS=Homo sapiens GN=FLG2 PE=1 SV=1                                                      | Q5D862                 | 248 kDa          | 0                          | 0                | 1                | 0              | 0              |
| Elongation factor 2 OS=Homo sapiens GN=EEF2 PE=1 SV=4                                              | P13639                 | 95 kDa           | 0                          | 0                | 1                | 0              | 0              |
| Probable ATP-dependent RNA helicase DDX5 OS=Homo sapiens GN=DDX5 PE=1 SV=1                         | J3KT44 (+2)            | 69 kDa           | 0                          | 0                | 1                | 0              | 0              |
| ATP-dependent RNA helicase DDX3X OS=Homo sapiens GN=DDX3X PE=4 SV=1                                | A0A0955F53 (+4)        | 81 kDa           | 0                          | 0                | 1                | 0              | 0              |
| Protein unc-119 homolog A OS=Homo sapiens GN=UNC119 PE=1 SV=1                                      | Q13432                 | 27 kDa           | 7                          | 10               | 0                | 0              | 0              |
| E3 ubiquitin-protein ligase CBL OS=Homo sapiens GN=CBL PE=1 SV=2                                   | P22681                 | 100 kDa          | TRUE                       | 0                | 8                | 0              | 0              |
| T-complex protein 1 subunit delta OS=Homo sapiens GN=CCT4 PE=1 SV=4                                | P50991 (+1)            | 58 kDa           | 1                          | 4                | 0                | 0              | 0              |
| Protein unc-119 homolog B OS=Homo sapiens GN=UNC119B PE=1 SV=1                                     | A5N9H7                 | 28 kDa           | 0                          | 4                | 0                | 0              | 0              |
| Sister chromatid cohesion protein POSS homolog A OS=Homo sapiens GN=PDSSA PE=1 SV=1                | Q298F7                 | 151 kDa          | 0                          | 4                | 0                | 0              | 0              |
| 60 kDa heat shock protein, mitochondrial OS=Homo sapiens GN=HSPD1 PE=1 SV=2                        | P10809                 | 61 kDa           | 0                          | 1                | 0                | 0              | 0              |
| Doublecortin domain-containing protein 1 OS=Homo sapiens GN=DCDC1 PE=4 SV=1                        | MOR2J8                 | 201 kDa          | 1                          | 0                | 0                | 0              | 0              |



**SI Table 3:** Total spectrum counts of the proteins identified by mass spectrometry following tandem affinity purification of stable Jurkat and K562 cell lines expressing the bait proteins Mb(Lck\_1) or Mb(Lck\_3), 2nd TAP.

| Protein Name | Count  |
|--------------|--------|
| Protein A    | 1000   |
| Protein B    | 2000   |
| Protein C    | 3000   |
| Protein D    | 4000   |
| Protein E    | 5000   |
| Protein F    | 6000   |
| Protein G    | 7000   |
| Protein H    | 8000   |
| Protein I    | 9000   |
| Protein J    | 10000  |
| Protein K    | 11000  |
| Protein L    | 12000  |
| Protein M    | 13000  |
| Protein N    | 14000  |
| Protein O    | 15000  |
| Protein P    | 16000  |
| Protein Q    | 17000  |
| Protein R    | 18000  |
| Protein S    | 19000  |
| Protein T    | 20000  |
| Protein U    | 21000  |
| Protein V    | 22000  |
| Protein W    | 23000  |
| Protein X    | 24000  |
| Protein Y    | 25000  |
| Protein Z    | 26000  |
| Protein AA   | 27000  |
| Protein AB   | 28000  |
| Protein AC   | 29000  |
| Protein AD   | 30000  |
| Protein AE   | 31000  |
| Protein AF   | 32000  |
| Protein AG   | 33000  |
| Protein AH   | 34000  |
| Protein AI   | 35000  |
| Protein AJ   | 36000  |
| Protein AK   | 37000  |
| Protein AL   | 38000  |
| Protein AM   | 39000  |
| Protein AN   | 40000  |
| Protein AO   | 41000  |
| Protein AP   | 42000  |
| Protein AQ   | 43000  |
| Protein AR   | 44000  |
| Protein AS   | 45000  |
| Protein AT   | 46000  |
| Protein AU   | 47000  |
| Protein AV   | 48000  |
| Protein AW   | 49000  |
| Protein AX   | 50000  |
| Protein AY   | 51000  |
| Protein AZ   | 52000  |
| Protein BA   | 53000  |
| Protein BB   | 54000  |
| Protein BC   | 55000  |
| Protein BD   | 56000  |
| Protein BE   | 57000  |
| Protein BF   | 58000  |
| Protein BG   | 59000  |
| Protein BH   | 60000  |
| Protein BI   | 61000  |
| Protein BJ   | 62000  |
| Protein BK   | 63000  |
| Protein BL   | 64000  |
| Protein BM   | 65000  |
| Protein BN   | 66000  |
| Protein BO   | 67000  |
| Protein BP   | 68000  |
| Protein BQ   | 69000  |
| Protein BR   | 70000  |
| Protein BS   | 71000  |
| Protein BT   | 72000  |
| Protein BU   | 73000  |
| Protein BV   | 74000  |
| Protein BW   | 75000  |
| Protein BX   | 76000  |
| Protein BY   | 77000  |
| Protein BZ   | 78000  |
| Protein CA   | 79000  |
| Protein CB   | 80000  |
| Protein CC   | 81000  |
| Protein CD   | 82000  |
| Protein CE   | 83000  |
| Protein CF   | 84000  |
| Protein CG   | 85000  |
| Protein CH   | 86000  |
| Protein CI   | 87000  |
| Protein CJ   | 88000  |
| Protein CK   | 89000  |
| Protein CL   | 90000  |
| Protein CM   | 91000  |
| Protein CN   | 92000  |
| Protein CO   | 93000  |
| Protein CP   | 94000  |
| Protein CQ   | 95000  |
| Protein CR   | 96000  |
| Protein CS   | 97000  |
| Protein CT   | 98000  |
| Protein CU   | 99000  |
| Protein CV   | 100000 |
| Protein CW   | 101000 |
| Protein CX   | 102000 |
| Protein CY   | 103000 |
| Protein CZ   | 104000 |
| Protein DA   | 105000 |
| Protein DB   | 106000 |
| Protein DC   | 107000 |
| Protein DD   | 108000 |
| Protein DE   | 109000 |
| Protein DF   | 110000 |
| Protein DG   | 111000 |
| Protein DH   | 112000 |
| Protein DI   | 113000 |
| Protein DJ   | 114000 |
| Protein DK   | 115000 |
| Protein DL   | 116000 |
| Protein DM   | 117000 |
| Protein DN   | 118000 |
| Protein DO   | 119000 |
| Protein DP   | 120000 |
| Protein DQ   | 121000 |
| Protein DR   | 122000 |
| Protein DS   | 123000 |
| Protein DT   | 124000 |
| Protein DU   | 125000 |
| Protein DV   | 126000 |
| Protein DW   | 127000 |
| Protein DX   | 128000 |
| Protein DY   | 129000 |
| Protein DZ   | 130000 |
| Protein EA   | 131000 |
| Protein EB   | 132000 |
| Protein EC   | 133000 |
| Protein ED   | 134000 |
| Protein EE   | 135000 |
| Protein EF   | 136000 |
| Protein EG   | 137000 |
| Protein EH   | 138000 |
| Protein EI   | 139000 |
| Protein EJ   | 140000 |
| Protein EK   | 141000 |
| Protein EL   | 142000 |
| Protein EM   | 143000 |
| Protein EN   | 144000 |
| Protein EO   | 145000 |
| Protein EP   | 146000 |
| Protein EQ   | 147000 |
| Protein ER   | 148000 |
| Protein ES   | 149000 |
| Protein ET   | 150000 |
| Protein EU   | 151000 |
| Protein EV   | 152000 |
| Protein EW   | 153000 |
| Protein EX   | 154000 |
| Protein EY   | 155000 |
| Protein EZ   | 156000 |
| Protein FA   | 157000 |
| Protein FB   | 158000 |
| Protein FC   | 159000 |
| Protein FD   | 160000 |
| Protein FE   | 161000 |
| Protein FF   | 162000 |
| Protein FG   | 163000 |
| Protein FH   | 164000 |
| Protein FI   | 165000 |
| Protein FJ   | 166000 |
| Protein FK   | 167000 |
| Protein FL   | 168000 |
| Protein FM   | 169000 |
| Protein FN   | 170000 |
| Protein FO   | 171000 |
| Protein FP   | 172000 |
| Protein FQ   | 173000 |
| Protein FR   | 174000 |
| Protein FS   | 175000 |
| Protein FT   | 176000 |
| Protein FU   | 177000 |
| Protein FV   | 178000 |
| Protein FW   | 179000 |
| Protein FX   | 180000 |
| Protein FY   | 181000 |
| Protein FZ   | 182000 |
| Protein GA   | 183000 |
| Protein GB   | 184000 |
| Protein GC   | 185000 |
| Protein GD   | 186000 |
| Protein GE   | 187000 |
| Protein GF   | 188000 |
| Protein GG   | 189000 |
| Protein GH   | 190000 |
| Protein GI   | 191000 |
| Protein GJ   | 192000 |
| Protein GK   | 193000 |
| Protein GL   | 194000 |
| Protein GM   | 195000 |
| Protein GN   | 196000 |
| Protein GO   | 197000 |
| Protein GP   | 198000 |
| Protein GQ   | 199000 |
| Protein GR   | 200000 |
| Protein GS   | 201000 |
| Protein GT   | 202000 |
| Protein GU   | 203000 |
| Protein GV   | 204000 |
| Protein GW   | 205000 |
| Protein GX   | 206000 |
| Protein GY   | 207000 |
| Protein GZ   | 208000 |
| Protein HA   | 209000 |
| Protein HB   | 210000 |
| Protein HC   | 211000 |
| Protein HD   | 212000 |
| Protein HE   | 213000 |
| Protein HF   | 214000 |
| Protein HG   | 215000 |
| Protein HH   | 216000 |
| Protein HI   | 217000 |
| Protein HJ   | 218000 |
| Protein HK   | 219000 |
| Protein HL   | 220000 |
| Protein HM   | 221000 |
| Protein HN   | 222000 |
| Protein HO   | 223000 |
| Protein HP   | 224000 |
| Protein HQ   | 225000 |
| Protein HR   | 226000 |
| Protein HS   | 227000 |
| Protein HT   | 228000 |
| Protein HU   | 229000 |
| Protein HV   | 230000 |
| Protein HW   | 231000 |
| Protein HX   | 232000 |
| Protein HY   | 233000 |
| Protein HZ   | 234000 |
| Protein IA   | 235000 |
| Protein IB   | 236000 |
| Protein IC   | 237000 |
| Protein ID   | 238000 |
| Protein IE   | 239000 |
| Protein IF   | 240000 |
| Protein IG   | 241000 |
| Protein IH   | 242000 |
| Protein II   | 243000 |
| Protein IJ   | 244000 |
| Protein IK   | 245000 |
| Protein IL   | 246000 |
| Protein IM   | 247000 |
| Protein IN   | 248000 |
| Protein IO   | 249000 |
| Protein IP   | 250000 |
| Protein IQ   | 251000 |
| Protein IR   | 252000 |
| Protein IS   | 253000 |
| Protein IT   | 254000 |
| Protein IU   | 255000 |
| Protein IV   | 256000 |
| Protein IW   | 257000 |
| Protein IX   | 258000 |
| Protein IY   | 259000 |
| Protein IZ   | 260000 |
| Protein JA   | 261000 |
| Protein JB   | 262000 |
| Protein JC   | 263000 |
| Protein JD   | 264000 |
| Protein JE   | 265000 |
| Protein JF   | 266000 |
| Protein JG   | 267000 |
| Protein JH   | 268000 |
| Protein JI   | 269000 |
| Protein JJ   | 270000 |
| Protein JK   | 271000 |
| Protein JL   | 272000 |
| Protein JM   | 273000 |
| Protein JN   | 274000 |
| Protein JO   | 275000 |
| Protein JP   | 276000 |
| Protein JQ   | 277000 |
| Protein JR   | 278000 |
| Protein JS   | 279000 |
| Protein JT   | 280000 |
| Protein JU   | 281000 |
| Protein JV   | 282000 |
| Protein JW   | 283000 |
| Protein JX   | 284000 |
| Protein JY   | 285000 |
| Protein JZ   | 286000 |
| Protein KA   | 287000 |
| Protein KB   | 288000 |
| Protein KC   | 289000 |
| Protein KD   | 290000 |
| Protein KE   | 291000 |
| Protein KF   | 292000 |
| Protein KG   | 293000 |
| Protein KH   | 294000 |
| Protein KI   | 295000 |
| Protein KJ   | 296000 |
| Protein KK   | 297000 |
| Protein KL   | 298000 |
| Protein KM   | 299000 |
| Protein KN   | 300000 |
| Protein KO   | 301000 |
| Protein KP   | 302000 |
| Protein KQ   | 303000 |
| Protein KR   | 304000 |
| Protein KS   | 305000 |
| Protein KT   | 306000 |
| Protein KU   | 307000 |
| Protein KV   | 308000 |
| Protein KW   | 309000 |
| Protein KX   | 310000 |
| Protein KY   | 311000 |
| Protein KZ   | 312000 |
| Protein LA   | 313000 |
| Protein LB   | 314000 |
| Protein LC   | 315000 |
| Protein LD   | 316000 |
| Protein LE   | 317000 |
| Protein LF   | 318000 |
| Protein LG   | 319000 |
| Protein LH   | 320000 |
| Protein LI   | 321000 |
| Protein LJ   | 322000 |
| Protein LK   | 323000 |
| Protein LL   | 324000 |
| Protein LM   | 325000 |
| Protein LN   | 326000 |
| Protein LO   | 327000 |
| Protein LP   | 328000 |
| Protein LQ   | 329000 |
| Protein LR   | 330000 |
| Protein LS   | 331000 |
| Protein LT   | 332000 |
| Protein LU   | 333000 |
| Protein LV   | 334000 |
| Protein LW   | 335000 |
| Protein LX   | 336000 |
| Protein LY   | 337000 |
| Protein LZ   | 338000 |
| Protein MA   | 339000 |
| Protein MB   | 340000 |
| Protein MC   | 341000 |
| Protein MD   | 342000 |
| Protein ME   | 343000 |
| Protein MF   | 344000 |
| Protein MG   | 345000 |
| Protein MH   | 346000 |
| Protein MI   | 347000 |
| Protein MJ   | 348000 |
| Protein MK   | 349000 |
| Protein ML   | 350000 |
| Protein MM   | 351000 |
| Protein MN   | 352000 |
| Protein MO   | 353000 |
| Protein MP   | 354000 |
| Protein MQ   | 355000 |
| Protein MR   | 356000 |
| Protein MS   | 357000 |
| Protein MT   | 358000 |
| Protein MU   | 359000 |
| Protein MV   | 360000 |
| Protein MW   | 361000 |
| Protein MX   | 362000 |
| Protein MY   | 363000 |
| Protein MZ   | 364000 |
| Protein NA   | 365000 |
| Protein NB   | 366000 |
| Protein NC   | 367000 |
| Protein ND   | 368000 |
| Protein NE   | 369000 |
| Protein NF   | 370000 |
| Protein NG   | 371000 |
| Protein NH   | 372000 |
| Protein NI   | 373000 |
| Protein NJ   | 374000 |
| Protein NK   | 375000 |
| Protein NL   | 376000 |
| Protein NM   | 377000 |
| Protein NN   | 378000 |
| Protein NO   | 379000 |
| Protein NP   | 380000 |
| Protein NQ   | 381000 |
| Protein NR   | 382000 |
| Protein NS   | 383000 |
| Protein NT   | 384000 |
| Protein NU   | 385000 |
| Protein NV   | 386000 |
| Protein NW   | 387000 |
| Protein NX   | 388000 |
| Protein NY   | 389000 |
| Protein NZ   | 390000 |
| Protein OA   | 391000 |
| Protein OB   | 392000 |
| Protein OC   | 393000 |
| Protein OD   | 394000 |
| Protein OE   | 395000 |
| Protein OF   | 396000 |
| Protein OG   | 397000 |
| Protein OH   | 398000 |
| Protein OI   | 399000 |
| Protein OJ   | 400000 |
| Protein OK   | 401000 |
| Protein OL   | 402000 |
| Protein OM   | 403000 |
| Protein ON   | 404000 |
| Protein OO   | 405000 |
| Protein OP   | 406000 |
| Protein OQ   | 407000 |
| Protein OR   | 408000 |
| Protein OS   | 409000 |
| Protein OT   | 410000 |
| Protein OU   | 411000 |
| Protein OV   | 412000 |
| Protein OW   | 413000 |
| Protein OX   | 414000 |
| Protein OY   | 415000 |
| Protein OZ   | 416000 |
| Protein PA   | 417000 |
| Protein PB   | 418000 |
| Protein PC   | 419000 |
| Protein PD   | 420000 |
| Protein PE   | 421000 |
| Protein PF   | 422000 |
| Protein PG   | 423000 |
| Protein PH   | 424000 |
| Protein PI   | 425000 |
| Protein PJ   | 426000 |
| Protein PK   | 427000 |
| Protein PL   | 428000 |
| Protein PM   | 429000 |
| Protein PN   | 430000 |
| Protein PO   | 431000 |
| Protein PP   | 432000 |
| Protein PQ   | 433000 |
| Protein PR   | 434000 |
| Protein PS   | 435000 |
| Protein PT   | 436000 |
| Protein PU   | 437000 |
| Protein PV   | 438000 |
| Protein PW   | 439000 |
| Protein PX   | 440000 |
| Protein PY   | 441000 |
| Protein PZ   | 442000 |
| Protein QA   | 443000 |
| Protein QB   | 444000 |
| Protein QC   | 445000 |
| Protein QD   | 446000 |
| Protein QE   | 447000 |
| Protein QF   | 448000 |
| Protein QG   | 449000 |
| Protein QH   | 450000 |
| Protein QI   | 451000 |
| Protein QJ   | 452000 |
| Protein QK   | 453000 |
| Protein QL   | 454000 |
| Protein QM   | 455000 |
| Protein QN   | 456000 |
| Protein QO   | 457000 |
| Protein QP   | 458000 |
| Protein QQ   | 459000 |
| Protein QR   | 460000 |
| Protein QS   | 461000 |
| Protein QT   | 462000 |
| Protein QU   | 463000 |
| Protein QV   | 464000 |
| Protein QW   | 465000 |
| Protein QX   | 466000 |
| Protein QY   | 467000 |
| Protein QZ   | 468000 |
| Protein RA   | 469000 |
| Protein RB   | 470000 |
| Protein RC   | 471000 |
| Protein RD   | 472000 |
| Protein RE   | 473000 |
| Protein RF   | 474000 |
| Protein RG   | 475000 |
| Protein RH   | 476000 |
| Protein RI   | 477000 |
| Protein RJ   | 478000 |
| Protein RK   | 479000 |
| Protein RL   | 480000 |
| Protein RM   | 481000 |
| Protein RN   | 482000 |
| Protein RO   | 483000 |
| Protein RP   | 484000 |
| Protein RQ   | 485000 |
| Protein RR   | 486000 |
| Protein RS   | 487000 |
| Protein RT   | 488000 |
| Protein RU   | 489000 |
| Protein RV   | 490000 |
| Protein RW   | 491000 |
| Protein RX   | 492000 |
| Protein RY   | 493000 |
| Protein RZ   | 494000 |
| Protein SA   | 495000 |
| Protein SB   | 496000 |
| Protein SC   | 497000 |
| Protein SD   | 498000 |
| Protein SE   | 499000 |
| Protein SF   | 500000 |
| Protein SG   | 501000 |
| Protein SH   | 502000 |
| Protein SI   | 503000 |
| Protein SJ   | 504000 |
| Protein SK   | 505000 |
| Protein SL   | 506000 |
| Protein SM   | 507000 |
| Protein SN   | 508000 |
| Protein SO   | 509000 |
| Protein SP   | 510000 |
| Protein SQ   | 511000 |
| Protein SR   | 512000 |
| Protein SS   | 513000 |
| Protein ST   | 514000 |
| Protein SU   | 515000 |
| Protein SV   | 516000 |
| Protein SW   | 517000 |
| Protein SX   | 518000 |
| Protein SY   | 519000 |
| Protein SZ   | 520000 |
| Protein TA   | 521000 |
| Protein TB   | 522000 |
| Protein TC   | 523000 |
| Protein TD   | 524000 |
| Protein TE   | 525000 |
| Protein TF   | 526000 |
| Protein TG   | 527000 |
| Protein TH   | 528000 |
| Protein TI   | 529000 |
| Protein TJ   | 530000 |
| Protein TK   | 531000 |
| Protein TL   | 532000 |
| Protein TM   | 533000 |
| Protein TN   | 534000 |
